# Supplementary material
Source: publisher figshare collection journal article supplement (https://acs.figshare.com/ndownloader/files/8000071)
Supplement: Supplementary file 1 [file 8000071]

## Sheet: Table S2
Table S2. Comparison of Synechocystis sp. PCC 6803 malonylome with other bacterial malonylomes.
Synechocystis sp. PCC 6803		E. coli		Saccharopolyspora erythraea
Protein_ID	Description	Protein_ID	Description	Protein_ID	Description
slr2076	60kD chaperonin	sp|P0A6F5|CH60_ECOLI	60 kDa chaperonin	sp|A4F749|CH601_SACEN	60 kDa chaperonin 1
slr0752	enolase	sp|P0A6P9|ENO_ECOLI	Enolase	sp|A4F804|ENO_SACEN	Enolase
sll1747	chorismate synthase	sp|P12008|AROC_ECOLI	Chorismate synthase	sp|A4FBE6|AROC_SACEN	Chorismate synthase
slr0394	phosphoglycerate kinase	sp|P0A799|PGK_ECOLI	Phosphoglycerate kinase	sp|A4FBM5|PGK_SACEN	Phosphoglycerate kinase
sll1043	polyribonucleotide nucleotidyltransferase	sp|P05055|PNP_ECOLI	Polyribonucleotide nucleotidyltransferase	sp|A4FM22|PNP_SACEN	Polyribonucleotide nucleotidyltransferase
slr0744	translation initiation factor IF-2	sp|P0A705|IF2_ECOLI	Translation initiation factor IF-2	sp|A4FM34|IF2_SACEN	Translation initiation factor IF-2
sll1261	elongation factor TS	sp|P0A6P1|EFTS_ECOLI	Elongation factor Ts	sp|A4FMD6|EFTS_SACEN	Elongation factor Ts
sll0179	glutamyl-tRNA synthetase	sp|P04805|SYE_ECOLI	Glutamate--tRNA ligase	sp|A4FMP6|SYE_SACEN	Glutamate--tRNA ligase
sll1363	ketol-acid reductoisomerase	sp|P05793|ILVC_ECOLI	Ketol-acid reductoisomerase	sp|A4FMQ5|ILVC_SACEN	Ketol-acid reductoisomerase
sll1326	ATP synthase alpha chain	sp|P0ABB0|ATPA_ECOLI	ATP synthase subunit alpha	sp|A4FN29|ATPA_SACEN	ATP synthase subunit alpha
sll1819	50S ribosomal protein L17	sp|P0AG44|RL17_ECOLI	50S ribosomal protein L17	sp|A4FPJ1|RL17_SACEN	50S ribosomal protein L17
sll1818	RNA polymerase alpha subunit	sp|P0A7Z4|RPOA_ECOLI	DNA-directed RNA polymerase subunit alpha	sp|A4FPJ2|RPOA_SACEN	DNA-directed RNA polymerase subunit alpha
sll1807	50S ribosomal protein L24	sp|P60624|RL24_ECOLI	50S ribosomal protein L24	sp|A4FPL4|RL24_SACEN	50S ribosomal protein L24
sll1099	elongation factor Tu	sp|P0CE47|EFTU1_ECOLI	Elongation factor Tu 1	sp|A4FPM7|EFTU_SACEN	Elongation factor Tu
sll1098	elongation factor EF-G	sp|P0A6M8|EFG_ECOLI	Elongation factor G	sp|A4FPM8|EFG_SACEN	Elongation factor G
sll1789	RNA polymerase beta prime subunit	sp|P0A8T7|RPOC_ECOLI	DNA-directed RNA polymerase subunit beta'	sp|A4FPP2|RPOC_SACEN	DNA-directed RNA polymerase subunit beta'
sll1746	50S ribosomal protein L12	sp|P0A7K2|RL7_ECOLI	50S ribosomal protein L7/L12	sp|A4FPQ6|RL7_SACEN	50S ribosomal protein L7/L12
sll1745	50S ribosomal protein L10	sp|P0A7J3|RL10_ECOLI	50S ribosomal protein L10	sp|A4FPQ7|RL10_SACEN	50S ribosomal protein L10
slr0965	DNA polymerase III beta subunit			tr|A4F5N3|A4F5N3_SACEN	DNA polymerase III subunit beta
sll1941	DNA gyrase A subunit	sp|P0AES4|GYRA_ECOLI	DNA gyrase subunit A	tr|A4F5N8|A4F5N8_SACEN	DNA gyrase subunit A
slr1703	seryl-tRNA synthetase	sp|P0A8L1|SYS_ECOLI	Serine--tRNA ligase	tr|A4F636|A4F636_SACEN	Seryl-tRNA synthetase
slr1622	soluble inorganic pyrophosphatase	sp|P0A7A9|IPYR_ECOLI	Inorganic pyrophosphatase	tr|A4F6R5|A4F6R5_SACEN	Inorganic pyrophosphatase
sll0017	glutamate-1-semialdehyde aminomutase			tr|A4F709|A4F709_SACEN	Diaminobutyrate--pyruvate aminotransferase
slr1516	superoxide dismutase	sp|P0AGD3|SODF_ECOLI	Superoxide dismutase [Fe]	tr|A4F7E0|A4F7E0_SACEN	Superoxide dismutase
slr2094	fructose-1,6-/sedoheptulose-1,7-bisphosphatase			tr|A4F893|A4F893_SACEN	Fructose-1,6-bisphosphatase
slr0242	bacterioferritin comigratory protein homolog	sp|P0AE52|BCP_ECOLI	Putative peroxiredoxin bcp	tr|A4F917|A4F917_SACEN	Bacterioferritin comigratory protein
slr0557	valyl-tRNA synthetase	sp|P07118|SYV_ECOLI	Valine--tRNA ligase	tr|A4F9I1|A4F9I1_SACEN	Valine--tRNA ligase
slr1129	ribonuclease E	sp|P0A9J0|RNG_ECOLI	Ribonuclease G	tr|A4F9K3|A4F9K3_SACEN	Ribonuclease, Rne/Rng family
sll1561	proline oxidase	sp|P37685|ALDB_ECOLI	Aldehyde dehydrogenase B	tr|A4F9Q3|A4F9Q3_SACEN	Methylmalonate-semialdehyde dehydrogenase (Acylating)
slr1756	glutamate--ammonia ligase	sp|P0A9C5|GLNA_ECOLI	Glutamine synthetase	tr|A4FA67|A4FA67_SACEN	Glutamine synthetase
sll0078	threonyl-tRNA synthetase	sp|P0A8M3|SYT_ECOLI	Threonine--tRNA ligase	tr|A4FB89|A4FB89_SACEN	Threonine--tRNA ligase
slr1349	glucose-6-phosphate isomerase	sp|P0A6T1|G6PI_ECOLI	Glucose-6-phosphate isomerase	tr|A4FBN9|A4FBN9_SACEN	Glucose-6-phosphate isomerase
sll1070	transketolase	sp|P27302|TKT1_ECOLI	Transketolase 1	tr|A4FBP1|A4FBP1_SACEN	Transketolase
sll1553	phenylalanyl-tRNA synthetase	sp|P07395|SYFB_ECOLI	Phenylalanine--tRNA ligase beta subunit	tr|A4FKE0|A4FKE0_SACEN	Phenylalanine--tRNA ligase beta subunit
slr0974	initiation factor IF-3	sp|P0A707|IF3_ECOLI	Translation initiation factor IF-3;Translation initiation factor IF-3, N-terminally processed;Translation initiation factor IF-3S	tr|A4FKE5|A4FKE5_SACEN	Translation initiation factor IF-3
slr1984	nucleic acid-binding protein, 30S ribosomal protein S1 homolog	sp|P0AG67|RS1_ECOLI	30S ribosomal protein S1	tr|A4FKU1|A4FKU1_SACEN	30S ribosomal protein S1
sll1841	pyruvate dehydrogenase dihydrolipoamide acetyltransferase component (E2)	sp|P0AFG6|ODO2_ECOLI	Dihydrolipoyllysine-residue succinyltransferase component of 2-oxoglutarate dehydrogenase complex	tr|A4FLD5|A4FLD5_SACEN	Acetyltransferase component of pyruvate dehydrogenase complex
slr1096	dihydrolipoamide dehydrogenase	sp|P0A9P0|DLDH_ECOLI	Dihydrolipoyl dehydrogenase	tr|A4FLD8|A4FLD8_SACEN	Dihydrolipoyl dehydrogenase
sll1275	pyruvate kinase 2	sp|P0AD61|KPYK1_ECOLI	Pyruvate kinase I	tr|A4FLI0|A4FLI0_SACEN	Pyruvate kinase
sll1633	cell division protein FtsZ	sp|P0A9A6|FTSZ_ECOLI	Cell division protein FtsZ	tr|A4FLU4|A4FLU4_SACEN	Cell division protein FtsZ
sll1635	Thy1 protein homolog			tr|A4FM10|A4FM10_SACEN	Thymidylate synthase ThyX
sll1712	DNA binding protein HU	sp|P0ACF0|DBHA_ECOLI	DNA-binding protein HU-alpha	tr|A4FMP0|A4FMP0_SACEN	Histone-like DNA binding protein
sll1908	D-3-phosphoglycerate dehydrogenase	sp|P0A9T0|SERA_ECOLI	D-3-phosphoglycerate dehydrogenase	tr|A4FMQ3|A4FMQ3_SACEN	D-3-phosphoglycerate dehydrogenase (PgdH)
slr1993	PHA-specific beta-ketothiolase			tr|A4FMY4|A4FMY4_SACEN	Acetyl-CoA acetyltransferase
slr1329	ATP synthase beta subunit	sp|P0ABB4|ATPB_ECOLI	ATP synthase subunit beta	tr|A4FN27|A4FN27_SACEN	ATP synthase subunit beta
slr2075	10kD chaperonin			tr|A4FPA6|A4FPA6_SACEN	10 kDa chaperonin
sll0166	a fusion protein between uroporphyrinogen-III C-methyltransferase (CobA/CorA) and uroporphyrinogen-III synthase (HemD)			tr|A4FPY2|A4FPY2_SACEN	Uroporphyrinogen III synthase/methyltransferase
slr1783	two-component response regulator NarL subfamily	sp|P0AA16|OMPR_ECOLI	Transcriptional regulatory protein OmpR	tr|A4FQ02|A4FQ02_SACEN	Two-component response regulator
sll0018	fructose-bisphosphate aldolase, class II	sp|P0C8J6|GATY_ECOLI	D-tagatose-1,6-bisphosphate aldolase subunit GatY	tr|A4FQL3|A4FQL3_SACEN	Fructose-bisphosphate aldolase
slr0925	single-stranded DNA-binding protein	sp|P0AGE0|SSB_ECOLI	Single-stranded DNA-binding protein	tr|A4FR31|A4FR31_SACEN	Single-stranded DNA-binding protein
sll0329	6-phosphogluconate dehydrogenase	sp|P00350|6PGD_ECOLI	6-phosphogluconate dehydrogenase, decarboxylating
sll1362	isoleucyl-tRNA synthetase	sp|P00956|SYI_ECOLI	Isoleucine--tRNA ligase
slr0649	methionyl-tRNA synthetase	sp|P00959|SYM_ECOLI	Methionine--tRNA ligase
sll0370	carbamoyl-phosphate synthase, pyrimidine-specific, large chain	sp|P00968|CARB_ECOLI	Carbamoyl-phosphate synthase large chain
slr2058	DNA topoisomerase I	sp|P06612|TOP1_ECOLI	DNA topoisomerase 1
slr1887	porphobilinogen deaminase (hydroxymethylbilane synthase, preuroporphyrinogen synthase)	sp|P06983|HEM3_ECOLI	Porphobilinogen deaminase
slr0608	histidine biosynthesis bifunctional protein HisIE	sp|P06989|HIS2_ECOLI	Histidine biosynthesis bifunctional protein HisIE;Phosphoribosyl-AMP cyclohydrolase;Phosphoribosyl-ATP pyrophosphatase
sll0461	gamma-glutamyl phosphate reductase	sp|P07004|PROA_ECOLI	Gamma-glutamyl phosphate reductase
sll1074	leucyl-tRNA synthetase	sp|P07813|SYL_ECOLI	Leucine--tRNA ligase
slr1289	isocitrate dehydrogenase (NADP+)	sp|P08200|IDH_ECOLI	Isocitrate dehydrogenase [NADP]
sll0897	DnaJ protein, heat shock protein 40, molecular chaperone	sp|P08622|DNAJ_ECOLI	Chaperone protein DnaJ
sll0057	heat shock protein GrpE	sp|P09372|GRPE_ECOLI	Protein GrpE
sll1463	cell division protein FtsH	sp|P0A6H1|CLPX_ECOLI	ATP-dependent Clp protease ATP-binding subunit ClpX
slr0434	elongation factor P	sp|P0A6N8|EFPL_ECOLI	Elongation factor P-like protein
sll0170	DnaK protein 2, heat shock protein 70, molecular chaperone	sp|P0A6Y8|DNAK_ECOLI	Chaperone protein DnaK
sll0934	carboxysome formation protein CcmA	sp|P0A715|KDSA_ECOLI	2-dehydro-3-deoxyphosphooctonate aldolase
sll0902	ornithine carbamoyltransferase	sp|P0A786|PYRB_ECOLI	Aspartate carbamoyltransferase catalytic chain
sll1196	phosphofructokinase	sp|P0A796|K6PF1_ECOLI	6-phosphofructokinase isozyme 1
slr1226	phosphoribosyl aminoidazole succinocarboxamide synthetase	sp|P0A7D7|PUR7_ECOLI	Phosphoribosylaminoimidazole-succinocarboxamide synthase
slr0185	orotate phosphoribosyltransferase	sp|P0A7E3|PYRE_ECOLI	Orotate phosphoribosyltransferase
sll0144	uridine monophosphate kinase	sp|P0A7E9|PYRH_ECOLI	Uridylate kinase
sll1740	50S ribosomal protein L19	sp|P0A7K6|RL19_ECOLI	50S ribosomal protein L19
sll1744	50S ribosomal protein L1	sp|P0A7L0|RL1_ECOLI	50S ribosomal protein L1
ssr1604	50S ribosomal protein L28	sp|P0A7M2|RL28_ECOLI	50S ribosomal protein L28
ssr1398	50S ribosomal protein L33	sp|P0A7N9|RL33_ECOLI	50S ribosomal protein L33
sll1101	30S ribosomal protein S10	sp|P0A7R5|RS10_ECOLI	30S ribosomal protein S10
sll1096	30S ribosomal protein S12	sp|P0A7S3|RS12_ECOLI	30S ribosomal protein S12
sll1816	30S ribosomal protein S13	sp|P0A7S9|RS13_ECOLI	30S ribosomal protein S13
ssr0482	30S ribosomal protein S16	sp|P0A7T3|RS16_ECOLI	30S ribosomal protein S16
ssr1399	30S ribosomal protein S18	sp|P0A7T7|RS18_ECOLI	30S ribosomal protein S18
ssl3432	30S ribosomal protein S19	sp|P0A7U3|RS19_ECOLI	30S ribosomal protein S19
sll1260	30S ribosomal protein S2	sp|P0A7V0|RS2_ECOLI	30S ribosomal protein S2
sll1822	30S ribosomal protein S9	sp|P0A7X3|RS9_ECOLI	30S ribosomal protein S9
slr0194	ribose 5-phosphate isomerase	sp|P0A7Z0|RPIA_ECOLI	Ribose-5-phosphate isomerase A
sll0145	ribosome releasing factor	sp|P0A805|RRF_ECOLI	Ribosome-recycling factor
slr1847	hypothetical protein	sp|P0A8B5|YBAB_ECOLI	Nucleoid-associated protein YbaB
sll0495	asparaginyl-tRNA synthetase	sp|P0A8M0|SYN_ECOLI	Asparagine--tRNA ligase
sll0567	ferric uptake regulation protein	sp|P0A9A9|FUR_ECOLI	Ferric uptake regulation protein
slr0884	glyceraldehyde 3-phosphate dehydrogenase 1 (NAD+)	sp|P0A9B2|G3P1_ECOLI	Glyceraldehyde-3-phosphate dehydrogenase A
slr0549	aspartate beta-semialdehyde dehydrogenese	sp|P0A9Q9|DHAS_ECOLI	Aspartate-semialdehyde dehydrogenase
slr0623	thioredoxin	sp|P0AA25|THIO_ECOLI	Thioredoxin-1
sll1069	3-oxoacyl-[acyl-carrier-protein] synthase II	sp|P0AAI5|FABF_ECOLI	3-oxoacyl-[acyl-carrier-protein] synthase 2
sll1325	ATP synthase delta chain of CF(1)	sp|P0ABA4|ATPD_ECOLI	ATP synthase subunit delta
slr1890	bacterioferritin	sp|P0ABD3|BFR_ECOLI	Bacterioferritin
slr1843	glucose 6-phosphate dehydrogenase	sp|P0AC53|G6PD_ECOLI	Glucose-6-phosphate 1-dehydrogenase;Extracellular death factor
sll1994	porphobilinogen synthase (5-aminolevulinate dehydratase)	sp|P0ACB2|HEM2_ECOLI	Delta-aminolevulinic acid dehydratase
sll1924	cAMP receptor protein sycrp1 homolog	sp|P0ACJ8|CRP_ECOLI	cAMP receptor protein
slr0635	hypothetical protein	sp|P0ADE8|YGFZ_ECOLI	tRNA-modifying protein YgfZ
ssl1784	30S ribosomal protein S15	sp|P0ADZ4|RS15_ECOLI	30S ribosomal protein S15
slr1198	antioxidant protein	sp|P0AE08|AHPC_ECOLI	Alkyl hydroperoxide reductase subunit C
slr0886	3-oxoacyl-[acyl-carrier protein] reductase	sp|P0AEK2|FABG_ECOLI	3-oxoacyl-[acyl-carrier-protein] reductase FabG
slr1051	enoyl-[acyl-carrier-protein] reductase	sp|P0AEK4|FABI_ECOLI	Enoyl-[acyl-carrier-protein] reductase [NADH] FabI
slr1176	glucose-1-phosphate adenylyltransferase	sp|P0AEP3|GALU_ECOLI	UTP--glucose-1-phosphate uridylyltransferase
slr0743	similar to N utilization substance protein	sp|P0AFF6|NUSA_ECOLI	Transcription termination/antitermination protein NusA
sll1742	transcription antitermination protein NusG	sp|P0AFG0|NUSG_ECOLI	Transcription termination/antitermination protein NusG
sll0947	light repressed protein A homolog	sp|P0AFX0|HPF_ECOLI	Ribosome hibernation promoting factor
sll1810	50S ribosomal protein L6	sp|P0AG55|RL6_ECOLI	50S ribosomal protein L6
slr0628	30S ribosomal protein S14	sp|P0AG59|RS14_ECOLI	30S ribosomal protein S14
ssl3437	30S ribosomal protein S17	sp|P0AG63|RS17_ECOLI	30S ribosomal protein S17
slr1031	tyrosyl tRNA synthetase	sp|P0AGJ9|SYY_ECOLI	Tyrosine--tRNA ligase
sll1811	50S ribosomal protein L18	sp|P0C018|RL18_ECOLI	50S ribosomal protein L18
slr0652	phosphorybosilformimino-5-amino- phosphorybosil-4-imidazolecarboxamideisomerase	sp|P10371|HIS4_ECOLI	1-(5-phosphoribosyl)-5-[(5-phosphoribosylamino)methylideneamino] imidazole-4-carboxamide isomerase
slr1133	L-argininosuccinate lyase	sp|P11447|ARLY_ECOLI	Argininosuccinate lyase
slr0900	molybdopterin biosynthesis MoeA protein	sp|P12281|MOEA_ECOLI	Molybdopterin molybdenumtransferase
sll1583	unknown protein	sp|P15042|DNLJ_ECOLI	DNA ligase
slr0597	phosphoribosyl aminoimidazole carboxy formyl formyltransferase/inosinemonophosphate cyclohydrolase (PUR-H(J))	sp|P15639|PUR9_ECOLI	Bifunctional purine biosynthesis protein PurH;Phosphoribosylaminoimidazolecarboxamide formyltransferase;IMP cyclohydrolase
sll1425	proline-tRNA ligase	sp|P16659|SYP_ECOLI	Proline--tRNA ligase
slr1791	phosphoadenosine phosphosulfate reductase	sp|P17854|CYSH_ECOLI	Phosphoadenosine phosphosulfate reductase
slr1720	aspartyl-tRNA synthetase	sp|P21889|SYD_ECOLI	Aspartate--tRNA ligase
slr1517	3-isopropylmalate dehydrogenase	sp|P30125|LEU3_ECOLI	3-isopropylmalate dehydrogenase
slr0665	aconitate hydratase	sp|P36683|ACON2_ECOLI	Aconitate hydratase 2
sll0726	phosphoglucomutase	sp|P36938|PGM_ECOLI	Phosphoglucomutase
sll2001	leucine aminopeptidase	sp|P37095|PEPB_ECOLI	Peptidase B
sll1213	GDP-fucose synthetase	sp|P37759|RMLB1_ECOLI	dTDP-glucose 4,6-dehydratase 1
slr1719	DrgA protein homolog	sp|P38489|NFNB_ECOLI	Oxygen-insensitive NAD(P)H nitroreductase
slr1784	biliverdin reductase	sp|P42599|YGJR_ECOLI	Uncharacterized oxidoreductase YgjR
sll0575	probable lipopolysaccharide ABC transporter ATP binding subunit	sp|P43672|UUP_ECOLI	ABC transporter ATP-binding protein uup
slr0402	hypothetical protein	sp|P52061|RDGB_ECOLI	dITP/XTP pyrophosphatase
sll1802	50S ribosomal protein L2	sp|P60422|RL2_ECOLI	50S ribosomal protein L2
slr1722	inosine-5'-monophosphate dehydrogenase	sp|P60560|GUAC_ECOLI	GMP reductase
sll1803	50S ribosomal protein L22	sp|P61175|RL22_ECOLI	50S ribosomal protein L22
sll1808	50S ribosomal protein L5	sp|P62399|RL5_ECOLI	50S ribosomal protein L5
slr1124	phosphoglycerate mutase	sp|P62707|GPMA_ECOLI	2,3-bisphosphoglycerate-dependent phosphoglycerate mutase
ssl0601	30S ribosomal protein S21	sp|P68679|RS21_ECOLI	30S ribosomal protein S21
